# Supplementary material
Source: HighWire-hosted journal article supplement (https://bmjopen.bmj.com/content/8/6/e015823)
Supplement: inline-supplementary-material-3 [file inline-supplementary-material-3.pdf]

**APPENDIX 3: Criteria and Descriptors for Marking Scheme (University of Birmingham, 2015)**

| <b>Level Criteria and Outcomes</b>                                                                                                                                                                                                                                                                                                                                                                                                                                                                                                                                                                                                                                                                                | <b>Mark Range</b> | <b>Grade Descriptor</b>                                                                                                                                                    |
|-------------------------------------------------------------------------------------------------------------------------------------------------------------------------------------------------------------------------------------------------------------------------------------------------------------------------------------------------------------------------------------------------------------------------------------------------------------------------------------------------------------------------------------------------------------------------------------------------------------------------------------------------------------------------------------------------------------------|-------------------|----------------------------------------------------------------------------------------------------------------------------------------------------------------------------|
| <p><b>Distinction</b><br/> Evidence of substantial preparation (reading, research, planning)<br/> Demonstrates an authoritative grasp of concepts, methodology and content<br/> Evidence of originality, insight and learning beyond the curriculum<br/> A sense of what is contextually appropriate<br/> Ability to sustain an argument or idea<br/> Ability to think analytically/critically &amp; to synthesise material effectively<br/> Ability consistently to produce comprehensive &amp; appropriate ranges of original &amp; creative solutions to problems<br/> Excellent structured and articulated work, which communicates ideas coherently using a range of appropriate methods of presentation</p> | 77% +             | <p><b>Outstanding Performance</b><br/> Consistently outstanding<br/> Trivial Defects only<br/> Fulfils 'distinction' criteria to an exceptionally high standard</p>        |
|                                                                                                                                                                                                                                                                                                                                                                                                                                                                                                                                                                                                                                                                                                                   | 73–76%            | <p><b>Excellent</b><br/> Outstanding in more respects<br/> Very few minor defects<br/> Displays all the 'distinction' criteria to a very high standard</p>                 |
|                                                                                                                                                                                                                                                                                                                                                                                                                                                                                                                                                                                                                                                                                                                   | 70–72%            | <p><b>Very good, some excellent</b><br/> Some outstanding and excellent work<br/> Some minor defects<br/> Displays all the 'distinction' criteria</p>                      |
| <p><b>Merit</b><br/> Evidence of use of a wide range of appropriate sources<br/> Demonstrates a sound, consistent and above average level of understanding of concepts, methodology and content appropriate to the subject<br/> Evidence of critical judgement and insight, ability to synthesise with some originality of thought<br/> Work demonstrates a very good degree of accuracy, clarity, critical analysis and some originality<br/> Ability to produce appropriate solutions to problems, showing some creativity<br/> Very well structured and good standard of presentation, which illustrates pertinent issues within a clear framework</p>                                                         | 67-69%            | <p><b>Very Good</b><br/> Work consistently of a very high standard<br/> Any defects minor<br/> Displays all 'merit' criteria with greater insight and originality</p>      |
|                                                                                                                                                                                                                                                                                                                                                                                                                                                                                                                                                                                                                                                                                                                   | 63-66%            | <p><b>Good, some very good</b><br/> Work of a high standard<br/> Some defects<br/> Displays all 'merit' criteria</p>                                                       |
|                                                                                                                                                                                                                                                                                                                                                                                                                                                                                                                                                                                                                                                                                                                   | 60-62%            | <p><b>Good</b><br/> Work of a high standard<br/> Deficiencies more significant<br/> Displays all 'merit' criteria but with less originality &amp; insight</p>              |
| <p><b>Pass</b><br/> Achieves the relevant learning outcomes for that module but with some deficiencies/shortcomings<br/> Evidence of sound preparation and reading<br/> Sound understanding of key concepts, methodology and content appropriate to the subject<br/> Work demonstrates a good degree of accuracy, clarity, critical analysis and occasional originality<br/> Ability to produce appropriate solutions to problems, some of which may show creativity<br/> There should be no major omissions or misunderstandings<br/> Well structured, reasonable standard of presentation, which illustrates pertinent issues with a clear framework</p>                                                        | 57-59%            | <p><b>Satisfactory</b><br/> Sound work with few significant defects<br/> Demonstrates all pass' criteria with a reasonable degree of critical analysis and originality</p> |
|                                                                                                                                                                                                                                                                                                                                                                                                                                                                                                                                                                                                                                                                                                                   | 54-56%            | <p><b>Satisfactory, some weaknesses</b><br/> Sound work, but with some notable deficiencies<br/> Displays all 'pass' criteria</p>                                          |
|                                                                                                                                                                                                                                                                                                                                                                                                                                                                                                                                                                                                                                                                                                                   | 50-53%            | <p><b>Significant weaknesses, but achieves relevant learning outcomes</b><br/> Work meets 'pass' criteria, but with some significant and/or recurring deficiencies</p>     |

|                                                                                                                                                                                                                                                                                                                                                                                                                                                                                                                         |        |                                                                                                                                                                        |
|-------------------------------------------------------------------------------------------------------------------------------------------------------------------------------------------------------------------------------------------------------------------------------------------------------------------------------------------------------------------------------------------------------------------------------------------------------------------------------------------------------------------------|--------|------------------------------------------------------------------------------------------------------------------------------------------------------------------------|
| <b>Fail</b><br>Does not achieve relevant learning outcomes<br>Some evidence of sound preparation<br>Some deficiencies or shortcomings<br>Some understanding of key concepts, methodology and content appropriate to the subject<br>Outcomes may be routine but work will demonstrate some degree of accuracy and clarity<br>Ability to produce appropriate solutions to problems, but with little or no creativity<br>Some major omissions or misunderstandings<br>Reasonable presentation and organisational structure | 47-49% | <b>Marginal fail</b><br>Just fails to achieve learning outcomes<br>May demonstrate some critical analysis & originality, but with major omissions or misunderstandings |
|                                                                                                                                                                                                                                                                                                                                                                                                                                                                                                                         | 43-46% | <b>Fail</b><br>Routine work, which may display some evidence of engagement with concepts and possibly with clear presentation, but with little critical analysis       |
|                                                                                                                                                                                                                                                                                                                                                                                                                                                                                                                         | 40-42% | <b>Clear Fail</b><br>Displays some evidence of engagement with concepts, but with defects in presentation & analysis                                                   |
| <b>Bad Fail (cannot be 'excused' on averaging)</b><br>Inadequate with major deficiencies and shortcomings<br>Little evidence of preparation and reading<br>Very little understanding of key concepts and methodology<br>Little content relevant to the subject<br>Major omissions and misunderstandings<br>Poor structure and presentation with errors that interfere with communication of ideas                                                                                                                       | 35-39% | <b>Bad Fail</b><br>Displays some evidence of engagement with concepts, but with serious defects                                                                        |
|                                                                                                                                                                                                                                                                                                                                                                                                                                                                                                                         | 30-34% | <b>Weak</b><br>Work demonstrates serious defects and misunderstandings                                                                                                 |
|                                                                                                                                                                                                                                                                                                                                                                                                                                                                                                                         | <30%   | <b>Very weak</b><br>Work does not meet basic requirements                                                                                                              |
