# Supplementary material
Source: HighWire-hosted journal article supplement (https://bmjopen.bmj.com/content/8/6/e015823)
Supplement: inline-supplementary-material-4 [file inline-supplementary-material-4.pdf]

#### APPENDIX 4: Base case analysis

The following 2 tables summarise the cost of the trial.

##### GTA arm

| GTA                 | Cost over trial (£) |
|---------------------|---------------------|
| GTA pay             | 7837.00             |
| Disposable speculum | 412.72              |
| Aquagel             | 825.44              |
| Gloves              | 26.80               |
| Couch Roll (Tissue) | 24.84               |
| Tissue box          | 64.80               |
| <b>Total</b>        | <b>9191.60</b>      |

##### Manikin arm

| Manikin        | Cost over trial (£) |
|----------------|---------------------|
| Lecturer / SpR | 1353.3              |
| Manikin        | 130.5               |
| Speculum       | 25.41               |
| <b>Total</b>   | <b>1509.21</b>      |
